# Supplementary material for: An Integrated Support System for People with Intellectual Disability
Source: MDPI journal article supplement (doi:10.3390/electronics12183803), 2023-09-08
Supplement: s1 [file s1]

**Table S1.** Web items that were used as recommendation material to people with ID who participated in the experimental evaluation of the proposed platform

| Category                      | Item ID | Item Title                                                                                         | Item Hyperlink                                                                                                                                                                                                                                                            |
|-------------------------------|---------|----------------------------------------------------------------------------------------------------|---------------------------------------------------------------------------------------------------------------------------------------------------------------------------------------------------------------------------------------------------------------------------|
| Timeliness & Weather Forecast | 1       | Δημοσιογραφική είδηση – Άρθρο εφημερίδας                                                           | <a href="https://www.greek-language.gr/digitalResources/modern_greek/tools/lexica/glossology_edu/lemma.html?id=182#colabbr05">https://www.greek-language.gr/digitalResources/modern_greek/tools/lexica/glossology_edu/lemma.html?id=182#colabbr05</a>                     |
|                               | 2       | Πώς γράφω ειδήσεις - άρθρα - ειδησεογραφικά κείμενα                                                | <a href="https://athea.gr/yliko/zp/eidisi/index.html">https://athea.gr/yliko/zp/eidisi/index.html</a>                                                                                                                                                                     |
|                               | 3       | Φωτογραφία περιοδικών                                                                              | <a href="https://images.pexels.com/photos/167538/pexels-photo-167538.jpeg?auto=compress&amp;cs=tinysrgb&amp;w=1260&amp;h=750&amp;dpr=1">https://images.pexels.com/photos/167538/pexels-photo-167538.jpeg?auto=compress&amp;cs=tinysrgb&amp;w=1260&amp;h=750&amp;dpr=1</a> |
|                               | 4       | Ειδήσεις                                                                                           | <a href="https://www.cnn.gr/eidhseis">https://www.cnn.gr/eidhseis</a>                                                                                                                                                                                                     |
|                               | 5       | Ελλάδα Διάφορα                                                                                     | <a href="https://www.e-telescope.gr/greece/greece-misc">https://www.e-telescope.gr/greece/greece-misc</a>                                                                                                                                                                 |
|                               | 6       | Αρχική. Εθνική Συνομοσπονδία Ατόμων με Αναπηρία                                                    | <a href="https://www.esamea.gr/el">https://www.esamea.gr/el</a>                                                                                                                                                                                                           |
|                               | 7       | ERT News. Live TV                                                                                  | <a href="https://www.ertnews.gr/live-tv/">https://www.ertnews.gr/live-tv/</a>                                                                                                                                                                                             |
|                               | 8       | Χανιά   Δελφίνια έκαναν επίδειξη στα ανοιχτά της Γραμβούσας – Προσέφεραν εντυπωσιακό θέαμα   Video | <a href="https://www.zarpanews.gr/chania-delfinia-ekanan-epideixi-sta-anoichta-tis-gramvoysas-proseferan-entyposiako-theama-video/">https://www.zarpanews.gr/chania-delfinia-ekanan-epideixi-sta-anoichta-tis-gramvoysas-proseferan-entyposiako-theama-video/</a>         |
|                               | 9       | EPT3 Μακεδονία 102                                                                                 | <a href="https://www.e-radio.gr/ERT3-Macedonia-102-Thessaloniki-i118/live">https://www.e-radio.gr/ERT3-Macedonia-102-Thessaloniki-i118/live</a>                                                                                                                           |
|                               | 10      | Μια είδηση σε διαφορετικές εφημερίδες                                                              | <a href="http://photodentro.edu.gr/v/item/ds/8521/3592">http://photodentro.edu.gr/v/item/ds/8521/3592</a>                                                                                                                                                                 |
|                               | 11      | !TV-LAB                                                                                            | <a href="http://photodentro.edu.gr/v/item/video/8522/827">http://photodentro.edu.gr/v/item/video/8522/827</a>                                                                                                                                                             |
|                               | 12      | Γενική Πρόγνωση Καιρού Ελλάδας                                                                     | <a href="http://www.emy.gr/emyl/el/forecast/deltia_kai_rou/geniki_prognosi">http://www.emy.gr/emyl/el/forecast/deltia_kai_rou/geniki_prognosi</a>                                                                                                                         |
|                               | 13      | ΔΕΛΤΙΟ ΚΑΙΡΟΥ ΧΑΝΙΑ                                                                                | <a href="https://www.meteo.gr/cf.cfm?city_id=21">https://www.meteo.gr/cf.cfm?city_id=21</a>                                                                                                                                                                               |
|                               | 14      | Δελτίο καιρού. Καθημερινά με τον Κλέαρχο Μαρουσάκη                                                 | <a href="https://www.tvopen.gr/deltiokairoy">https://www.tvopen.gr/deltiokairoy</a>                                                                                                                                                                                       |
|                               | 15      | ΔΕΛΤΙΟ ΚΑΙΡΟΥ με τον Σάκη Αρναούτογλου   10/07/2023   EPT                                          | <a href="https://youtu.be/_Fi0d9fOBK0">https://youtu.be/_Fi0d9fOBK0</a>                                                                                                                                                                                                   |
|                               | 16      | Αθλητικές Εφημερίδες                                                                               | <a href="https://www.cnn.gr/efimerides/athlitikes">https://www.cnn.gr/efimerides/athlitikes</a>                                                                                                                                                                           |
|                               | 17      | Η εισαγωγή των Ολυμπιακών αγωνισμάτων                                                              | <a href="https://ancientolympicsmuseum.com/?p=263">https://ancientolympicsmuseum.com/?p=263</a>                                                                                                                                                                           |
|                               | 18      | Οι Ολυμπιακοί Αγώνες της Αθήνας 2004                                                               | <a href="http://photodentro.edu.gr/v/item/video/8522/1364">http://photodentro.edu.gr/v/item/video/8522/1364</a>                                                                                                                                                           |
|                               | 19      | Ολυμπιακά αθλήματα: Τα χειμερινά ολυμπιακά αθλήματα                                                | <a href="http://photodentro.edu.gr/v/item/video/8522/1370">http://photodentro.edu.gr/v/item/video/8522/1370</a>                                                                                                                                                           |
|                               | 20      | Ολυμπιακά αθλήματα: Μοντέρνο πένταθλο                                                              | <a href="http://photodentro.edu.gr/v/item/video/8522/1266">http://photodentro.edu.gr/v/item/video/8522/1266</a>                                                                                                                                                           |

|                     |    |                                                                      |                                                                                                                                                                                                                                                                               |
|---------------------|----|----------------------------------------------------------------------|-------------------------------------------------------------------------------------------------------------------------------------------------------------------------------------------------------------------------------------------------------------------------------|
| Sports              | 21 | Αθλήματα υγρού στίβου:<br>Κολύμβηση - Πρόσθιο και<br>πεταλούδα       | <a href="http://photodentro.edu.gr/v/item/video/8522/1362">http://photodentro.edu.gr/v/item/video/8522/1362</a>                                                                                                                                                               |
|                     | 22 | Αγώνας κολύμβησης                                                    | <a href="https://images.pexels.com/photos/1263349/pexels-photo-1263349.jpeg?auto=compress&amp;cs=tinysrgb&amp;w=1260&amp;h=750&amp;dpr=1">https://images.pexels.com/photos/1263349/pexels-photo-1263349.jpeg?auto=compress&amp;cs=tinysrgb&amp;w=1260&amp;h=750&amp;dpr=1</a> |
|                     | 23 | EPA σπορ 101.8                                                       | <a href="https://www.ertecho.gr/radio/eraspor/">https://www.ertecho.gr/radio/eraspor/</a>                                                                                                                                                                                     |
|                     | 24 | EPT SPORTS                                                           | <a href="https://www.ertsports.gr/">https://www.ertsports.gr/</a>                                                                                                                                                                                                             |
|                     | 25 | Πόλο   Αθλητικές ειδήσεις για<br>το Πόλο στο SPORT24                 | <a href="https://www.sport24.gr/polo/">https://www.sport24.gr/polo/</a>                                                                                                                                                                                                       |
|                     | 26 | Videos   SPORT24                                                     | <a href="https://www.sport24.gr/videos/">https://www.sport24.gr/videos/</a>                                                                                                                                                                                                   |
|                     | 27 | Χρυσό για την Ντουντουάκη<br>στα 100μ. πεταλούδα  <br>18/05/21   EPT | <a href="https://youtu.be/DbEahaXK6Bg">https://youtu.be/DbEahaXK6Bg</a>                                                                                                                                                                                                       |
|                     | 28 | Αθλητικά                                                             | <a href="https://www.athinodromio.gr/topics/athlitika/">https://www.athinodromio.gr/topics/athlitika/</a>                                                                                                                                                                     |
|                     | 29 | Αθλητισμός - ΕΙΔΗΣΕΙΣ                                                | <a href="https://www.lifo.gr/now/sport">https://www.lifo.gr/now/sport</a>                                                                                                                                                                                                     |
|                     | 30 | Ταίριαξε το άθλημα με την<br>μπάλα ή το όργανο!                      | <a href="https://photodentro.edu.gr/v/item/ds/8521/10779">https://photodentro.edu.gr/v/item/ds/8521/10779</a>                                                                                                                                                                 |
| Animals &<br>Plants | 31 | Φυτά του τόπου μας - Το<br>αμπέλι                                    | <a href="https://photodentro.edu.gr/v/item/ds/8521/3548">https://photodentro.edu.gr/v/item/ds/8521/3548</a>                                                                                                                                                                   |
|                     | 32 | Φυτά (συλλογή φωτογραφιών)                                           | <a href="https://photodentro.edu.gr/v/item/ds/8521/3493">https://photodentro.edu.gr/v/item/ds/8521/3493</a>                                                                                                                                                                   |
|                     | 33 | Φυτά και βλάστηση σε άλλους<br>τόπους                                | <a href="https://photodentro.edu.gr/v/item/ds/8521/3662">https://photodentro.edu.gr/v/item/ds/8521/3662</a>                                                                                                                                                                   |
|                     | 34 | ΤΑΙΡΙΑΞΕ ΤΑ ΛΟΥΛΟΥΔΙΑ!                                               | <a href="https://photodentro.edu.gr/v/item/ds/8521/11008">https://photodentro.edu.gr/v/item/ds/8521/11008</a>                                                                                                                                                                 |
|                     | 35 | Η δυση του ήλιου -<br>Παπαρούνες                                     | <a href="https://pixabay.com/photos/sunset-poppies-field-red-poppies-815270/">https://pixabay.com/photos/sunset-poppies-field-red-poppies-815270/</a>                                                                                                                         |
|                     | 36 | Τα φυτά                                                              | <a href="https://youtu.be/vkX7Lm2fjfg">https://youtu.be/vkX7Lm2fjfg</a>                                                                                                                                                                                                       |
|                     | 37 | ΤΑ ΩΡΑΙΟΤΕΡΑ ΦΥΤΑ ΤΗΣ<br>ΕΛΛΑΔΑΣ - ΑΓΓΕΛΙΚΗ ΜΙΧΑΛΙΝΑ                 | <a href="https://youtu.be/Yek-7zE7hB8">https://youtu.be/Yek-7zE7hB8</a>                                                                                                                                                                                                       |
|                     | 38 | ΤΑ ΖΩΑ ΤΟΥ ΑΓΡΟΚΤΗΜΑΤΟΣ                                              | <a href="https://photodentro.edu.gr/v/item/ds/8521/3499">https://photodentro.edu.gr/v/item/ds/8521/3499</a>                                                                                                                                                                   |
|                     | 39 | ΤΑΙΡΙΑΞΕ ΤΑ ΖΩΑ ΤΟΥ ΔΑΣΟΥΣ!                                          | <a href="https://photodentro.edu.gr/v/item/ds/8521/11005">https://photodentro.edu.gr/v/item/ds/8521/11005</a>                                                                                                                                                                 |
|                     | 40 | ΓΝΩΡΙΖΩ ΤΑ ΖΩΑ ΤΗΣ<br>ΘΑΛΑΣΣΑΣ                                       | <a href="https://photodentro.edu.gr/v/item/ds/8521/3664">https://photodentro.edu.gr/v/item/ds/8521/3664</a>                                                                                                                                                                   |
|                     | 41 | ΤΑ ΖΩΑ ΤΟΥ ΓΛΥΚΟΥ ΝΕΡΟΥ                                              | <a href="https://photodentro.edu.gr/v/item/ds/8521/3559">https://photodentro.edu.gr/v/item/ds/8521/3559</a>                                                                                                                                                                   |
|                     | 42 | Πάντα και μωρό πάντα παίζουν                                         | <a href="https://images.pexels.com/photos/1661535/1661535.jpeg?auto=compress&amp;cs=tinysrgb&amp;w=1661535&amp;h=1040&amp;dpr=1">xels-photo-1661535.jpeg?auto=compress&amp;cs=tinysrgb&amp;w=1661535&amp;h=1040&amp;dpr=1</a>                                                 |
|                     | 43 | Τρυποκάρυδος                                                         | <a href="https://pixabay.com/videos/woodpecker-great-spotted-woodpecker-3285/">https://pixabay.com/videos/woodpecker-great-spotted-woodpecker-3285/</a>                                                                                                                       |
|                     | 44 | Μαϊμού Μακάκος Άγρια Ζωή                                             | <a href="https://pixabay.com/videos/monkey-macaque-wildlife-fauna-164765/">https://pixabay.com/videos/monkey-macaque-wildlife-fauna-164765/</a>                                                                                                                               |

|       |    |                                                                                                     |                                                                                                                                                         |
|-------|----|-----------------------------------------------------------------------------------------------------|---------------------------------------------------------------------------------------------------------------------------------------------------------|
|       | 45 | LIVECAMS / CURRENTLY LIVE                                                                           | <a href="https://explore.org/livecams">https://explore.org/livecams</a>                                                                                 |
| Music | 46 | Η ελληνική μουσική του χθες και του σήμερα                                                          | <a href="https://photodentro.edu.gr/v/item/ds/8521/6606">https://photodentro.edu.gr/v/item/ds/8521/6606</a>                                             |
|       | 47 | Όταν ο Vivaldi έχει κέφια                                                                           | <a href="https://photodentro.edu.gr/v/item/ds/8521/11355">https://photodentro.edu.gr/v/item/ds/8521/11355</a>                                           |
|       | 48 | Εφαρμογή για νέους μπλουζίστες                                                                      | <a href="https://photodentro.edu.gr/v/item/ds/8521/1407">https://photodentro.edu.gr/v/item/ds/8521/1407</a>                                             |
|       | 49 | Παίζω με τη Μουσική και τα Εικαστικά                                                                | <a href="https://photodentro.edu.gr/v/item/ds/8521/6163">https://photodentro.edu.gr/v/item/ds/8521/6163</a>                                             |
|       | 50 | Μια Μεσόγειος... Μουσική                                                                            | <a href="https://photodentro.edu.gr/v/item/ds/8521/11101">https://photodentro.edu.gr/v/item/ds/8521/11101</a>                                           |
|       | 51 | Rock FM                                                                                             | <a href="https://www.greekradios.gr/live/39/Rock-FM">https://www.greekradios.gr/live/39/Rock-FM</a>                                                     |
|       | 52 | MOUSIKOS   εντέχνως διαφορετικός   Μουσικός - Έντεχνα -Αθήνα                                        | <a href="http://live24.gr/radio/mousikos">http://live24.gr/radio/mousikos</a>                                                                           |
|       | 53 | 2ο Δεύτερο Πρόγραμμα                                                                                | <a href="https://www.ertecho.gr/radio/deftero/">https://www.ertecho.gr/radio/deftero/</a>                                                               |
|       | 54 | Radio Garden – Explore live radio by rotating the globe                                             | <a href="https://radio.garden/visit/thessaloniki/T6VpIBN4">https://radio.garden/visit/thessaloniki/T6VpIBN4</a>                                         |
|       | 55 | Scorpions, Nirvana, U2, Ledzeppelin, Journey ,Bon Jovi- Greatest Hits Slow Rock Ballads 70s,80s,90s | <a href="https://youtu.be/214FRhY0J6k">https://youtu.be/214FRhY0J6k</a>                                                                                 |
|       | 56 | Greek Pop (in the mix) #djiliaswise                                                                 | <a href="https://youtu.be/dP9qn3G4cCs">https://youtu.be/dP9qn3G4cCs</a>                                                                                 |
|       | 57 | Dance Music Mix 2022 / January Best of EDM, Slap House & Bigroom                                    | <a href="https://youtu.be/LAF-Vp-Aht8">https://youtu.be/LAF-Vp-Aht8</a>                                                                                 |
|       | 58 | Ελληνικό Έντεχνο   Οι Μπαλάντες της καρδιάς μας vol 3                                               | <a href="https://youtu.be/ge1CmTitOrQ">https://youtu.be/ge1CmTitOrQ</a>                                                                                 |
|       | 59 | ΑΘΑΝΑΤΑ ΚΡΗΤΙΚΑ ΤΡΑΓΟΥΔΙΑ   by DTU Records                                                          | <a href="https://youtu.be/iWiL8L3RJ1E">https://youtu.be/iWiL8L3RJ1E</a>                                                                                 |
|       | 60 | Νίκος Μακρόπουλος Επιτυχίες   Non Stop Mix - Nikos Makropoulos                                      | <a href="https://youtu.be/_5pkt48KJ-Q">https://youtu.be/_5pkt48KJ-Q</a>                                                                                 |
|       | 61 | Ταξίδι στην άκρη του σύμπαντος; Journey to the Edge of the Universe (2008)                          | <a href="https://youtu.be/0jtYFKlISzk">https://youtu.be/0jtYFKlISzk</a>                                                                                 |
|       | 62 | Σπίτι; Home (2009)                                                                                  | <a href="https://youtu.be/5EgvXw6lFZs?t=1281">https://youtu.be/5EgvXw6lFZs?t=1281</a>                                                                   |
|       | 63 | Summerhill (2008)                                                                                   | <a href="https://youtu.be/DGD_GRFg6y8">https://youtu.be/DGD_GRFg6y8</a>                                                                                 |
|       | 64 | Γράμματα στον Θεό; Letters to God (2010)                                                            | <a href="https://youtu.be/3FbqLzE97qY?list=PL0yZadJ-mPniZVrcNonOI_8aZiQaVcOSD">https://youtu.be/3FbqLzE97qY?list=PL0yZadJ-mPniZVrcNonOI_8aZiQaVcOSD</a> |
|       | 65 | PHARLAP - Το άλογο θρύλος; Phar Lap (1983)                                                          | <a href="https://youtu.be/Jpuds2JHcAg?list=PL0yZadJ-mPniZVrcNonOI_8aZiQaVcOSD">https://youtu.be/Jpuds2JHcAg?list=PL0yZadJ-mPniZVrcNonOI_8aZiQaVcOSD</a> |
|       | 66 | Πέντε εβδομάδες σ' ένα αερόστατο; Five Weeks in a Balloon (1962)                                    | <a href="https://youtu.be/2w6oMpNNOsA?list=PL0yZadJ-mPniZVrcNonOI_8aZiQaVcOSD">https://youtu.be/2w6oMpNNOsA?list=PL0yZadJ-mPniZVrcNonOI_8aZiQaVcOSD</a> |
|       | 67 | Η νεράιδα και το παλικάρι - Προξενιό Λενιώς                                                         | <a href="https://youtu.be/6M_1E2-HoK4">https://youtu.be/6M_1E2-HoK4</a>                                                                                 |

|               |    |                                                                       |                                                                                                                                                                                                     |
|---------------|----|-----------------------------------------------------------------------|-----------------------------------------------------------------------------------------------------------------------------------------------------------------------------------------------------|
| Movies        | 68 | 09. Ήτανε κάποιος άνθρωπος - Η Νεράιδα και το Παλικάρι (1969)         | <a href="https://youtu.be/D5K4fOIWPYM">https://youtu.be/D5K4fOIWPYM</a>                                                                                                                             |
|               | 69 | Ορκιστείτε Παρακαλώ - Μαμτάμ Φουφού 0000007414                        | <a href="https://archive.ert.gr/7414/">https://archive.ert.gr/7414/</a>                                                                                                                             |
|               | 70 | Remember when a walk on the moon                                      | <a href="https://www.ertflix.gr/en/vod/vod.127652-ta-kalytera-mas-chronia-ep1-mia-volta-sto-feggari">https://www.ertflix.gr/en/vod/vod.127652-ta-kalytera-mas-chronia-ep1-mia-volta-sto-feggari</a> |
|               | 71 | Μάγια η Μέλισσα: Επεισόδιο 1 - Ο Δικαστής των Μελισσών                | <a href="https://youtu.be/w7LSRXqnt4U?list=PLBO_IKjB8ClusmDRkNI7bATpXxvld1FDu">https://youtu.be/w7LSRXqnt4U?list=PLBO_IKjB8ClusmDRkNI7bATpXxvld1FDu</a>                                             |
|               | 72 | Τα 101 Σκυλάκια Δαλματίας                                             | <a href="https://youtu.be/zSxiT8D1FzI">https://youtu.be/zSxiT8D1FzI</a>                                                                                                                             |
|               | 73 | Στο Περιβόλι. Επεισόδιο 1 (πυλοτικό). Η Κερασιά. (Βαγγέλης Καραδήμας) | <a href="https://youtu.be/h0DDQoybhSw">https://youtu.be/h0DDQoybhSw</a>                                                                                                                             |
|               | 74 | Τα τρία γουρουνάκια                                                   | <a href="https://youtu.be/IMP4Gx_CiIQ">https://youtu.be/IMP4Gx_CiIQ</a>                                                                                                                             |
|               | 75 | Οι Μύθοι Του Αισώπου – Ο ΨΕΥΤΗΣ ΒΟΣΚΟΣ                                | <a href="https://youtu.be/prJFhM95i6k">https://youtu.be/prJFhM95i6k</a>                                                                                                                             |
| Internet & IT | 76 | Διαδίκτυο   ΤΠΕ   Δίκτυα υπολογιστών                                  | <a href="http://photodentro.edu.gr/v/item/video/8522/237">http://photodentro.edu.gr/v/item/video/8522/237</a>                                                                                       |
|               | 77 | Βασικές υπηρεσίες Διαδικτύου                                          | <a href="https://photodentro.edu.gr/v/item/ds/8521/993">https://photodentro.edu.gr/v/item/ds/8521/993</a>                                                                                           |
|               | 78 | Η λειτουργία μιας μηχανής αναζήτησης                                  | <a href="https://photodentro.edu.gr/v/item/ds/8521/621">https://photodentro.edu.gr/v/item/ds/8521/621</a>                                                                                           |
|               | 79 | Υπολογιστής, ένα «πολυ-εργαλείο»                                      | <a href="https://photodentro.edu.gr/v/item/ds/8521/2440">https://photodentro.edu.gr/v/item/ds/8521/2440</a>                                                                                         |
|               | 80 | Εξάσκηση στο Ελληνικό Πληκτρολόγιο                                    | <a href="http://photodentro.edu.gr/v/item/ugc/8525/2430">http://photodentro.edu.gr/v/item/ugc/8525/2430</a>                                                                                         |
|               | 81 | Ζωγραφική με το ποντίκι                                               | <a href="https://photodentro.edu.gr/v/item/ds/8521/2456">https://photodentro.edu.gr/v/item/ds/8521/2456</a>                                                                                         |
|               | 82 | Τα βασικά μέρη ενός υπολογιστή                                        | <a href="http://www.it.uom.gr/project/mycomputer/intro/comparts.html">http://www.it.uom.gr/project/mycomputer/intro/comparts.html</a>                                                               |
|               | 83 | Μάθημα 01: Εισαγωγή στην πληκτρολόγηση κειμένου                       | <a href="https://youtu.be/JlhxpXvHx3M">https://youtu.be/JlhxpXvHx3M</a>                                                                                                                             |
|               | 84 | Ο Κειμενογράφος μου                                                   | <a href="https://photodentro.edu.gr/v/item/ds/8521/2428">https://photodentro.edu.gr/v/item/ds/8521/2428</a>                                                                                         |
|               | 85 | Ο υπολογιστής στην καθημερινότητα                                     | <a href="https://photodentro.edu.gr/v/item/ds/8521/720">https://photodentro.edu.gr/v/item/ds/8521/720</a>                                                                                           |
|               | 86 | Λειτουργικό σύστημα ως noisis                                         | <a href="http://photodentro.edu.gr/v/item/video/8522/244">http://photodentro.edu.gr/v/item/video/8522/244</a>                                                                                       |
|               | 87 | Ψηφιακά αρχεία δεδομένων                                              | <a href="https://photodentro.edu.gr/v/item/ds/8521/2460">https://photodentro.edu.gr/v/item/ds/8521/2460</a>                                                                                         |
|               | 88 | Αποθήκευση εικόνας                                                    | <a href="https://photodentro.edu.gr/v/item/ds/8521/2438">https://photodentro.edu.gr/v/item/ds/8521/2438</a>                                                                                         |
|               | 89 | Το σχολικό εργαστήριο Πληροφορικής                                    | <a href="https://photodentro.edu.gr/v/item/ds/8521/978">https://photodentro.edu.gr/v/item/ds/8521/978</a>                                                                                           |
|               | 90 | Παίζοντας με tangram                                                  | <a href="https://photodentro.edu.gr/v/item/ds/8521/5623">https://photodentro.edu.gr/v/item/ds/8521/5623</a>                                                                                         |

|                  |     |                                                                                                           |                                                                                                                                             |
|------------------|-----|-----------------------------------------------------------------------------------------------------------|---------------------------------------------------------------------------------------------------------------------------------------------|
| Cooking & Pastry | 91  | Πατάτες Ψητές στο Φούρνο   Άκης Πετρετζίκης                                                               | <a href="https://youtu.be/lzorQmnLv9A">https://youtu.be/lzorQmnLv9A</a>                                                                     |
|                  | 92  | Μπιφτέκια στον φούρνο   Yiannis Lucacos                                                                   | <a href="https://youtu.be/xf2JnwBBTn4">https://youtu.be/xf2JnwBBTn4</a>                                                                     |
|                  | 93  | Γεμιστά   Yiannis Lucacos                                                                                 | <a href="https://youtu.be/WcN17J5OMB8">https://youtu.be/WcN17J5OMB8</a>                                                                     |
|                  | 94  | Μακαρόνια με κιμά   Yiannis Lucacos                                                                       | <a href="https://youtu.be/4syY9RjEGtl?list=RDCMUCbK7i-PotInIjVHhMxM25gA">https://youtu.be/4syY9RjEGtl?list=RDCMUCbK7i-PotInIjVHhMxM25gA</a> |
|                  | 95  | Η τέλεια μπριζόλα   Yiannis Lucacos                                                                       | <a href="https://youtu.be/2y9boexvT-M?list=RDCMUCbK7i-PotInIjVHhMxM25gA">https://youtu.be/2y9boexvT-M?list=RDCMUCbK7i-PotInIjVHhMxM25gA</a> |
|                  | 96  | Τορτίγια με κοτόπουλο και γιαούρτι   Yiannis Lucacos                                                      | <a href="https://youtu.be/Qyc3vw6mk6s?list=RDCMUCbK7i-PotInIjVHhMxM25gA">https://youtu.be/Qyc3vw6mk6s?list=RDCMUCbK7i-PotInIjVHhMxM25gA</a> |
|                  | 97  | Ριζότο με Μανιτάρια   Yiannis Lucacos                                                                     | <a href="https://youtu.be/hzOKzEn8gY0?list=RDCMUCbK7i-PotInIjVHhMxM25gA">https://youtu.be/hzOKzEn8gY0?list=RDCMUCbK7i-PotInIjVHhMxM25gA</a> |
|                  | 98  | Πατατοκροκέτες με Φρέσκια Ρίγανη   Ελένη Ψυχούλη   EPT                                                    | <a href="https://youtu.be/wiUdM0Y7Hmc">https://youtu.be/wiUdM0Y7Hmc</a>                                                                     |
|                  | 99  | Παραδοσιακή ελληνική πίτσα   Δημήτρης Μακρυνιώτης   EPT                                                   | <a href="https://youtu.be/ezOPf3hlzq4">https://youtu.be/ezOPf3hlzq4</a>                                                                     |
|                  | 100 | Κλασικό σπανακόρυζο με λεμόνι                                                                             | <a href="https://youtu.be/xSVIbgpWaZA?t=2">https://youtu.be/xSVIbgpWaZA?t=2</a>                                                             |
|                  | 101 | Παγωτό Στρατσιατέλα με 3 Υλικά   Dimitrios Makriniotis                                                    | <a href="https://youtu.be/CBP_r64Elp4">https://youtu.be/CBP_r64Elp4</a>                                                                     |
|                  | 102 | Creamy orange dessert in 5 minutes! Everyone is looking for this recipe! No baking, no flour, no gelatin! | <a href="https://youtu.be/LNepg7dVxMs">https://youtu.be/LNepg7dVxMs</a>                                                                     |
|                  | 103 | Συνταγή για μους σοκολάτας   Ελένη Ψυχούλη   EPT                                                          | <a href="https://youtu.be/vlOioiHdcsw?t=3">https://youtu.be/vlOioiHdcsw?t=3</a>                                                             |
|                  | 104 | Κορμός σοκολάτας από την Αργυρώ                                                                           | <a href="https://www.argiro.gr/recipe/kormos-sokolatas/">https://www.argiro.gr/recipe/kormos-sokolatas/</a>                                 |
|                  | 105 | Ελληνογερμανική ζαχαροπλαστική σύμπραξη                                                                   | <a href="https://youtu.be/vmW3j-U5eo0">https://youtu.be/vmW3j-U5eo0</a>                                                                     |
|                  | 106 | Συνταγή για κρύα πορσελάνη                                                                                | <a href="https://youtu.be/0jxTBHs-An4">https://youtu.be/0jxTBHs-An4</a>                                                                     |
|                  | 107 | Κολλαγραφία (Collagraphy)                                                                                 | <a href="https://youtu.be/UBxMFuvH4D0?list=PL912A1D32D2235930">https://youtu.be/UBxMFuvH4D0?list=PL912A1D32D2235930</a>                     |
|                  | 108 | Βίντεο με τεχνικές-Τεχνικές Λαδοπαστέλ (1)                                                                | <a href="https://youtu.be/eF89HnlpBD0?list=PL912A1D32D2235930">https://youtu.be/eF89HnlpBD0?list=PL912A1D32D2235930</a>                     |
|                  | 109 | Βίντεο με τεχνικές-Τεχνικές Νερομπογιάς                                                                   | <a href="https://youtu.be/lipw6WVTHd4?list=PL912A1D32D2235930">https://youtu.be/lipw6WVTHd4?list=PL912A1D32D2235930</a>                     |
|                  | 110 | Βίντεο με τεχνικές: Ψηφιδωτό (1) - με τη μέθοδο άμεσης τοποθέτησης ψηφίδων                                | <a href="https://youtu.be/y_E4ztVRhUM?list=PL912A1D32D2235930">https://youtu.be/y_E4ztVRhUM?list=PL912A1D32D2235930</a>                     |
|                  | 111 | Βίντεο με τεχνικές: Χαρακτική σε Λινόλεουμ                                                                | <a href="https://youtu.be/kfDsBaG3sBo?list=PL912A1D32D2235930">https://youtu.be/kfDsBaG3sBo?list=PL912A1D32D2235930</a>                     |
|                  | 112 | Βίντεο με τεχνικές: Μονοτυπία                                                                             | <a href="https://youtu.be/XZe56-WqFVU">https://youtu.be/XZe56-WqFVU</a>                                                                     |

|                                  |            |                                                                                                          |                                                                                                                         |
|----------------------------------|------------|----------------------------------------------------------------------------------------------------------|-------------------------------------------------------------------------------------------------------------------------|
| <b>Painting &amp;<br/>Crafts</b> | <b>113</b> | Βίντεο με τεχνικές:<br>Υφασματογραφία βάσει<br>σχεδίου (Μέρος Α')                                        | <a href="https://youtu.be/KUcdLfDv-PE?list=PL912A1D32D2235930">https://youtu.be/KUcdLfDv-PE?list=PL912A1D32D2235930</a> |
|                                  | <b>114</b> | Αυτόματη Σχεδίαση. Γρήγορη<br>ζωγραφική για όλους                                                        | <a href="https://www.autodraw.com/">https://www.autodraw.com/</a>                                                       |
|                                  | <b>115</b> | Εκπαιδευτικό Μαθαίνουμε τα<br>Χρώματα Το Ουράνιο τόξο της<br>Minnie #τα_καλυτερα<br>παραμυθια            | <a href="https://youtu.be/Re4TnOTGyf0">https://youtu.be/Re4TnOTGyf0</a>                                                 |
|                                  | <b>116</b> | Βόλτα με τη Γιαγιά μαθαίνουμε<br>τα χρώματα<br>#τα_καλυτερα_παραμυθια -<br>παραμύθια - Greek Fairy Tales | <a href="https://www.youtube.com/watch?v=p5oC7xVR9Jg">https://www.youtube.com/watch?v=p5oC7xVR9Jg</a>                   |
|                                  | <b>117</b> | Seascape Painting / Acrylic<br>Painting / STEP by STEP                                                   | <a href="https://youtu.be/8yR9y8NbAQo">https://youtu.be/8yR9y8NbAQo</a>                                                 |
|                                  | <b>118</b> | Bath Sponge & Q-tips painting<br>technique / How to draw<br>Romantic Couple beside tree                  | <a href="https://youtu.be/lwM1w-GCyhl">https://youtu.be/lwM1w-GCyhl</a>                                                 |
|                                  | <b>119</b> | Nail art design 2022 New nail<br>art ideas Tutorials                                                     | <a href="https://youtu.be/p3zNHNOQQ7E">https://youtu.be/p3zNHNOQQ7E</a>                                                 |
|                                  | <b>120</b> | How to Draw a Sports Car<br>Ferrari                                                                      | <a href="https://youtu.be/1ON04SezwgA">https://youtu.be/1ON04SezwgA</a>                                                 |
